# Supplementary material
Source: publisher site journal article supplement (https://www.dovepress.com/article/478359)
Supplement: Supplementary file 1 [file get_supplementary_file.php]

**Table S1**

Bivariate correlations between variables in the final path model

|  | | | | | | | | |
| --- | --- | --- | --- | --- | --- | --- | --- | --- |
| Variable | Academic video-conference (hours) | Personal video-conference (hours) | PSQI | IPAQ sedentary behavior | Semester GPA | DASS | Maladaptive use of technology | White ethnicity |
| Personal video-conference hours | -.025 |  |  |  |  |  |  |  |
| PSQI | .245** | .185* |  |  |  |  |  |  |
| IPAQ sedentary behavior | .158 | .028 | .061 |  |  |  |  |  |
| Semester GPA | .042 | -.157 | -.194* | .095 |  |  |  |  |
| DASS | .128 | .0003 | .542** | .243** | -.004 |  |  |  |
| Maladaptive use  of technology | -.022 | .125 | .127 | .104 | .037 | .181* |  |  |
| White ethnicity | .050 | .040 | -.001 | -.327** | -.108 | .035 | -.162 |  |
| Female gender | .236** | .160 | .099 | .092 | .244** | .202* | .076 | -.105 |
|  | | | | | | | | |

**Notes:**

PSQI = Pittsburgh Sleep Quality Inventory, global score; IPAQ: International Physical Activity Questionnaire; GPA = grade point average; DASS = Depression, Anxiety, Stress Scale.

***p* < .01; **p* < .05.

**Table S2**

Indirect effects for endogenous variables in the final path model

| **Endogenous variable** |  | **Predictor** | ***b*** | **95% Conf. Intervals** | | **p-value** | **β** |
| --- | --- | --- | --- | --- | --- | --- | --- |
|  | ***Lower bound*** | ***Upper bound*** |
|  |  |  |  |  |  |  |  |
| Sleep problems (PSQI) | <--- | Female gender | 0.530 | 0.209 | 0.949 | 0.005 | 0.082 |
|  |  |  |  |  |  |  |
| Sedentary behavior | <--- | Female gender | 0.285 | 0.060 | 0.634 | 0.035 | 0.041 |
|  |  |  |  |  |  |  |
| Semester GPA | <--- | Video calls (academic) | -0.005 | -0.011 | -0.001 | 0.018 | -0.047 |
|  | Video calls (personal) | -0.004 | -0.013 | 0.000 | 0.081 | -0.029 |
|  |  | Maladaptive Tech. Use | -0.024 | -0.057 | -0.005 | 0.034 | -0.050 |
|  |  | Female gender | -0.045 | -0.079 | -0.020 | 0.004 | -0.043 |
|  |  |  |  |  |  |  |  |
| Mental distress (DASS) | <--- | Video calls (academic) | 0.302 | 0.161 | 0.474 | < 0.001 | 0.156 |
|  | Video calls (personal) | 0.179 | -0.003 | 0.443 | 0.105 | 0.072 |
|  |  | Maladaptive Tech. Use | 1.192 | 0.643 | 1.894 | < 0.001 | 0.124 |
|  |  | Female gender | 0.484 | -0.203 | 1.290 | 0.236 | 0.023 |
|  |  | White ethnicity | -1.795 | -3.397 | -0.741 | 0.001 | -0.077 |
|  |  |  |  |  |  |  |  |

**Notes:**

PSQI = Pittsburgh Sleep Quality Inventory, global score; GPA = grade point average; DASS = Depression, Anxiety, Stress Scale. *b* = unstandardized effects; p-value is reported for the unstandardized effects; β = standardized effects. Bootstrapped 95% confidence intervals are presented.

Indirect effects equal to 0 are omitted from the table.

**Table S3**

Total effects for endogenous variables in the final path model

| **Endogenous variable** |  | **Predictor** | ***b*** | **95% Conf. Intervals** | | **p-value** | **β** |
| --- | --- | --- | --- | --- | --- | --- | --- |
|  | ***Lower bound*** | ***Upper bound*** |
|  |  |  |  |  |  |  |  |
| Video calls (academic) | <--- | Female gender | 2.552 | 1.449 | 3.708 | < .001 | 0.236 |
|  |  |  |  |  |  |  |
| Video calls (personal) | <--- | Female gender | 1.337 | 0.489 | 2.331 | 0.009 | 0.160 |
|  |  |  |  |  |  |  |
| Sleep problems (PSQI) | <--- | Video calls (academic) | 0.146 | 0.055 | 0.228 | 0.008 | 0.244 |
|  | Video calls (personal) | 0.117 | -0.007 | 0.268 | 0.117 | 0.151 |
|  |  | Maladaptive Tech. Use | 0.779 | 0.403 | 1.147 | < .001 | 0.261 |
|  |  | Female gender | 0.530 | 0.209 | 0.949 | 0.005 | 0.082 |
|  |  |  |  |  |  |  |  |
| Sedentary behavior | <--- | Video calls (academic) | 0.112 | 0.019 | 0.227 | 0.048 | 0.174 |
|  | Female gender | 0.285 | 0.060 | 0.634 | 0.035 | 0.041 |
|  |  | White ethnicity | -2.575 | -3.755 | -1.436 | < .001 | -0.334 |
|  |  |  |  |  |  |  |  |
| Semester GPA | <--- | Video calls (academic) | -0.005 | -0.011 | -0.001 | 0.018 | -0.047 |
|  | Video calls (personal) | -0.025 | -0.052 | -0.012 | 0.008 | -0.197 |
|  |  | Sleep problems (PSQI) | -0.031 | -0.058 | -0.006 | 0.040 | -0.192 |
|  |  | Maladaptive Tech. Use | -0.024 | -0.057 | -0.005 | 0.034 | -0.050 |
|  |  | Female gender | 0.261 | 0.089 | 0.435 | 0.013 | 0.247 |
|  |  |  |  |  |  |  |  |
| Mental distress (DASS) | <--- | Video calls (academic) | 0.302 | 0.161 | 0.474 | < .001 | 0.156 |
|  | Video calls (personal) | -0.214 | 0.618 | 0.144 | 0.343 | -0.085 |
|  |  | Sleep problems (PSQI) | 1.530 | 1.129 | 1.916 | < .001 | 0.474 |
|  |  | Sedentary behavior | 0.697 | 0.355 | 1.048 | 0.001 | 0.231 |
|  |  | Maladaptive Tech. Use | 3.520 | 2.162 | 4.878 | < .001 | 0.365 |
|  |  | Female gender | 3.120 | 0.833 | 5.611 | 0.030 | 0.149 |
|  |  | White ethnicity | 1.547 | -0.819 | 3.823 | 0.273 | 0.066 |
|  |  |  |  |  |  |  |  |

**Notes:**

PSQI = Pittsburgh Sleep Quality Inventory, global score; GPA = grade point average; DASS = Depression, Anxiety, Stress Scale; *b* = unstandardized effects; p-value is reported for the unstandardized effects; β = standardized effects. effect. Bootstrapped 95% confidence intervals are presented.

Total effects equal to 0 are omitted from the table.
